# Supplementary material
Source: publisher figshare collection journal article supplement (https://acs.figshare.com/ndownloader/files/9167629)
Supplement: Supplementary file 1 [file 9167629]

## Cover Sheet of the supporting information

**Authors:** Jujun Ruan, Jiaxin Huang, Lipeng Dong, Zhe Huang

**Title:** Environment-friendly Technology of Recovering Nickel Resource and Producing Nano- $\text{Al}_2\text{O}_3$  from Waste Metal Film Resistors

### Two Figures:

|           |       |         |
|-----------|-------|---------|
| Figure S1 | ..... | Page S2 |
| Figure S2 | ..... | Page S3 |
| Figure S3 | ..... | Page S3 |

## Supporting Information

# **Environment-friendly Technology of Recovering Nickel Resource and Producing Nano-Al<sub>2</sub>O<sub>3</sub> from Waste Metal Film Resistors**

Jujun Ruan\*, Jiaxin Huang, Lipeng Dong, Zhe Huang

School of Environmental Science and Engineering, Sun Yat-Sen University, 135 Xingang Xi  
Road, Guangzhou, 510275, People's Republic of China

Figures were listed as follows:

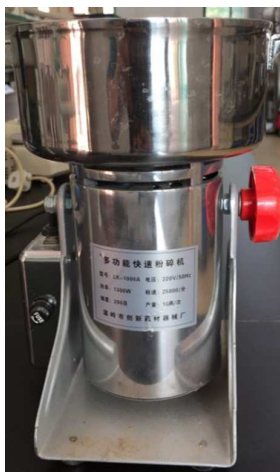

**Figure S1. Shearing machine for waste metallic film resistors (Company: Wenling  
Innovation mechanical equipment manufacturing Co., LTD, China; Capacity: 5 kg/min;  
Power Rating: 1.3 kW)**

---

Corresponding author: Jujun, Ruan Tel:+86 20 84113620; Fax:+86 20 84113620; E-mail:  
ruanjun@mail.sysu.edu.cn.

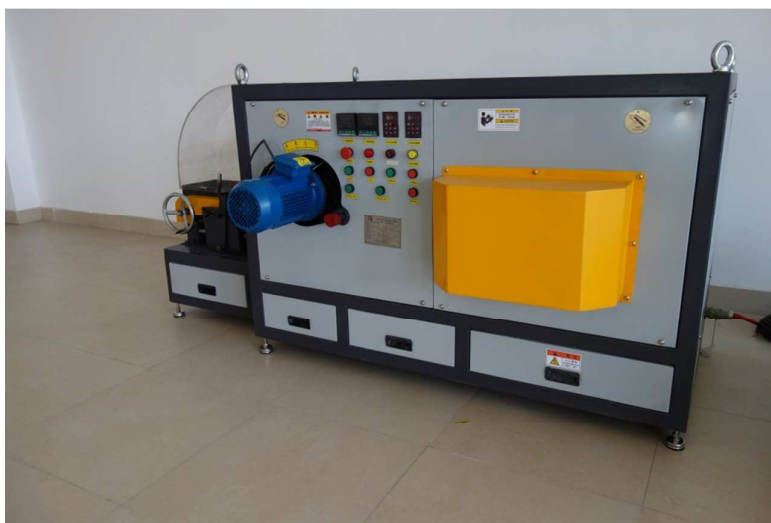

**Figure S2. The employed magnetic separator(Company: Fushun Jin Sheng Yu Yi mechanical and electrical equipment manufacturing Co., LTD, China; Capacity: 25 kg/min; Power Rating: 2.75 kW)**

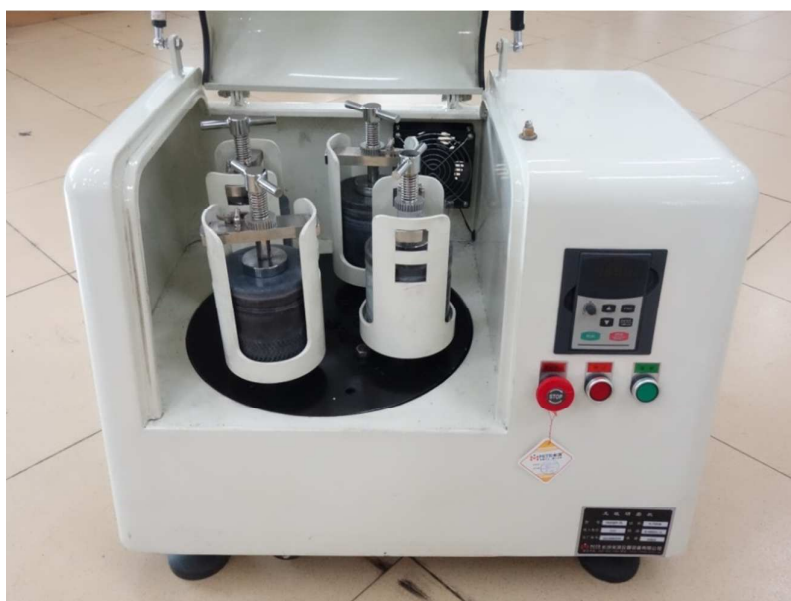

**Figure S3. Ball milling machine employed to produce nano- $\text{Al}_2\text{O}_3$  (Company: Changsha Miqi Instrument Equipment Co., LTD, China ; Capacity: 0.41kg/h ; Power Ratings: 0.75 kW)**
